# Supplementary material
Source: Springer Nature journal article supplement (https://www.springermedizin.de/resource/supplementary/13063_2013_1700_MOESM1_ESM.pdf/9620326)

SCREENING  
CHECK OF INCLUSION & EXCLUSION CRITERIA

RANDOMISATION

Randomisation and  
Initiation of Study  
Therapy within 48  
hours after diagnosis  
or initial procedure!

V.A.C.

SCWT

INITIATION OF WOUND THERAPY

ACTIVE STUDY TREATMENT TIME  
MAXIMUM 42 DAYS  
OR UNTIL WOUND CLOSURE

NO

STUDY SITE  
WEEKLY  
VISITS +  
WOUND  
ASSESSMENT  
&  
PHOTOGRAPHS

WOUND CLOSURE  
CONFIRMATION  
(14<sup>-0/+3</sup> Days)

WOUND  
CLOSURE

END  
OF  
TREATMENT

YES

DAY 42:  
END OF MAXIMUM STUDY TREATMENT TIME

FOLLOW UP Day 87 (-0 / +3 days)  
(for non-closed wounds only)

DAY 132 (-0 / +3 days): GENERAL FOLLOW UP

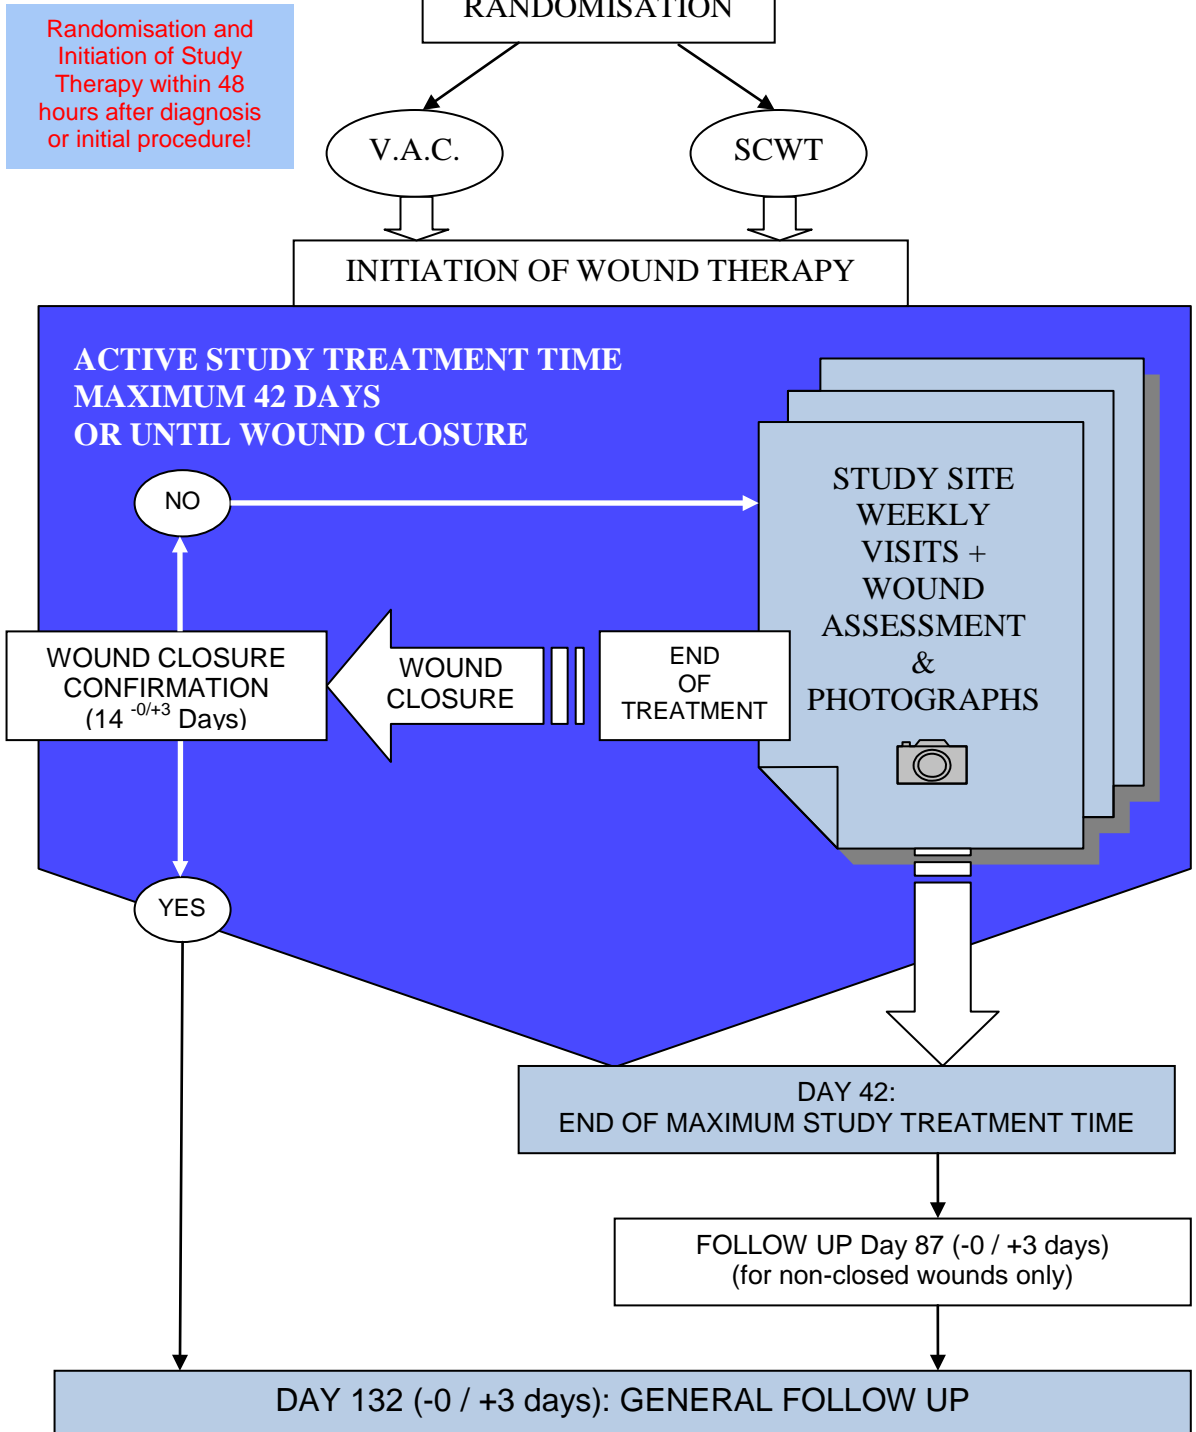

Supplement: MOESM1 [file 9620326]
